# Supplementary material for: Serum Anion Gap Predicts All-Cause Mortality in Critically Ill Patients with Acute Kidney Injury: Analysis of the MIMIC-III Database
Source: Hindawi journal article supplement (doi:10.1155/2020/6501272), 2020-01-21
Supplement: f1 [file 6501272.f1.pdf]

**Table 1** Relationship between bicarbonate and all-cause mortality in different models

| Variable                      | Crude Model       |                | Model I           |                | Model II          |                |
|-------------------------------|-------------------|----------------|-------------------|----------------|-------------------|----------------|
|                               | HR (95% CIs)      | <i>P</i> value | HR (95% CIs)      | <i>P</i> value | HR (95% CIs)      | <i>P</i> value |
| 30-day all-cause mortality    |                   |                |                   |                |                   |                |
| Bicarbonate (tertile), mmol/L |                   |                |                   |                |                   |                |
| <22                           | 1.0(ref)          |                | 1.0(ref)          |                | 1.0(ref)          |                |
| ≥22, <26                      | 0.66 (0.60, 0.73) | <0.0001        | 0.64 (0.58, 0.71) | <0.0001        | 1.01 (0.90, 1.12) | 0.9237         |
| ≥26                           | 0.56 (0.51, 0.62) | <0.0001        | 0.54 (0.49, 0.59) | <0.0001        | 1.00 (0.89, 1.13) | 0.9742         |
| <i>P</i> for trend            | <0.0001           |                | <0.0001           |                | 0.9680            |                |
| 90-day all-cause mortality    |                   |                |                   |                |                   |                |
| Bicarbonate (tertile), mmol/L |                   |                |                   |                |                   |                |
| <22                           | 1.0(ref)          |                | 1.0(ref)          |                | 1.0(ref)          |                |
| ≥22, <26                      | 0.68 (0.63, 0.74) | <0.0001        | 0.66 (0.61, 0.72) | <0.0001        | 1.02 (0.93, 1.12) | 0.6847         |
| ≥26                           | 0.60 (0.56, 0.66) | <0.0001        | 0.57 (0.53, 0.62) | <0.0001        | 1.03 (0.93, 1.13) | 0.6138         |
| <i>P</i> for trend            | <0.0001           |                | <0.0001           |                | 0.6074            |                |
| 365-day all-cause mortality   |                   |                |                   |                |                   |                |
| Bicarbonate (tertile), mmol/L |                   |                |                   |                |                   |                |
| <22                           | 1.0(ref)          |                | 1.0(ref)          |                | 1.0(ref)          |                |
| ≥22, <26                      | 0.72 (0.67, 0.78) | <0.0001        | 0.70 (0.65, 0.75) | <0.0001        | 1.03 (0.95, 1.12) | 0.5034         |
| ≥26                           | 0.69 (0.64, 0.74) | <0.0001        | 0.65 (0.61, 0.70) | <0.0001        | 1.08 (0.99, 1.17) | 0.0909         |

*P* for trend

<0.0001

<0.0001

0.0930

---

HR: hazard ratio; CI: confidence interval.

Models were derived from Cox proportional hazards regression models.

Crude model adjust for: none.

Adjust I model adjust for: age, gender.

Adjust II model adjust for: age, gender, acute kidney injury stage, congestive heart failure, coronary artery disease, liver disease, stroke, respiratory failure, pneumonia, SIRS, potassium, albumin, platelet, BUN, PT, INR, APTT, WBC, creatinine, bilirubin, SPO2, heart rate, systolic blood pressure, diastolic blood pressure, respiratory rate, temperature, Elixhauser comorbidity index, SOFA, SAPSII.

In Table 1, after adjusting for more relevant confounding factors, we found that bicarbonate levels were not independently associated with 30, 90 and 365-day all-cause mortality in critically ill patients with AKI.

**Table 2** Relationship between pH and all-cause mortality in different models

| Variable                    | Crude Model       |                | Model I           |                | Model II          |                |
|-----------------------------|-------------------|----------------|-------------------|----------------|-------------------|----------------|
|                             | HR (95% CIs)      | <i>P</i> value | HR (95% CIs)      | <i>P</i> value | HR (95% CIs)      | <i>P</i> value |
| 30-day all-cause mortality  |                   |                |                   |                |                   |                |
| pH (tertile)                |                   |                |                   |                |                   |                |
| <7.32                       | 1.0(ref)          |                | 1.0(ref)          |                | 1.0(ref)          |                |
| ≥7.32, <7.40                | 1.08 (0.81, 1.44) | 0.6181         | 0.87 (0.65, 1.17) | 0.3702         | 0.85 (0.58, 1.23) | 0.3887         |
| ≥7.40                       | 1.40 (1.08, 1.81) | 0.0107         | 1.02 (0.78, 1.33) | 0.8953         | 0.96 (0.66, 1.39) | 0.8230         |
| <i>P</i> for trend          | 0.0135            |                | 0.9221            |                | 0.7431            |                |
| 90-day all-cause mortality  |                   |                |                   |                |                   |                |
| pH (tertile)                |                   |                |                   |                |                   |                |
| <7.32                       | 1.0(ref)          |                | 1.0(ref)          |                | 1.0(ref)          |                |
| ≥7.32, <7.40                | 1.14 (0.83, 1.58) | 0.4209         | 0.94 (0.68, 1.31) | 0.7266         | 0.93 (0.62, 1.39) | 0.7225         |
| ≥7.40                       | 1.36 (1.02, 1.82) | 0.0387         | 1.03 (0.76, 1.38) | 0.8641         | 0.92 (0.61, 1.40) | 0.6989         |
| <i>P</i> for trend          | 0.0419            |                | 0.8789            |                | 0.6855            |                |
| 365-day all-cause mortality |                   |                |                   |                |                   |                |
| pH (tertile)                |                   |                |                   |                |                   |                |
| <7.32                       | 1.0(ref)          |                | 1.0(ref)          |                | 1.0(ref)          |                |
| ≥7.32, <7.40                | 1.12 (0.86, 1.45) | 0.4115         | 0.88 (0.68, 1.15) | 0.3618         | 0.86 (0.62, 1.21) | 0.4010         |
| ≥7.40                       | 1.44 (1.14, 1.82) | 0.0025         | 1.01 (0.79, 1.28) | 0.9561         | 0.92 (0.65, 1.29) | 0.6179         |

*P* for trend

0.0033

0.9786

0.5614

---

HR: hazard ratio; CI: confidence interval.

Models were derived from Cox proportional hazards regression models.

Crude model adjust for: none.

Adjust I model adjust for: age, gender.

Adjust II model adjust for: age, gender, acute kidney injury stage, congestive heart failure, coronary artery disease, liver disease, stroke, respiratory failure, albumin, platelet, BUN, PT, INR, APTT, WBC, creatinine, bicarbonate, systolic blood pressure, diastolic blood pressure, respiratory rate, temperature, Elixhauser comorbidity index, SOFA, SAPSII.

In Table 2, after adjusting for more relevant confounding factors, we found that **pH** values were not independently associated with 30, 90 and 365-day all-cause mortality in critically ill patients with AKI.

**Table 3** Relationship between lactate and all-cause mortality in different models

| Variable                    | Crude Model       |                | Model I           |                | Model II          |                |
|-----------------------------|-------------------|----------------|-------------------|----------------|-------------------|----------------|
|                             | HR (95% CIs)      | <i>P</i> value | HR (95% CIs)      | <i>P</i> value | HR (95% CIs)      | <i>P</i> value |
| 30-day all-cause mortality  |                   |                |                   |                |                   |                |
| Lactate (tertile), mmol/L   |                   |                |                   |                |                   |                |
| <1.9                        | 1.0(ref)          |                | 1.0(ref)          |                | 1.0(ref)          |                |
| ≥1.9, <3.5                  | 1.44 (1.28, 1.62) | <0.0001        | 1.43 (1.27, 1.61) | <0.0001        | 1.26 (1.10, 1.44) | 0.0006         |
| ≥3.5                        | 1.98 (1.77, 2.22) | <0.0001        | 2.02 (1.81, 2.27) | <0.0001        | 1.26 (1.10, 1.44) | 0.0009         |
| <i>P</i> for trend          | <0.0001           |                | <0.0001           |                | 0.0153            |                |
| 90-day all-cause mortality  |                   |                |                   |                |                   |                |
| Lactate (tertile), mmol/L   |                   |                |                   |                |                   |                |
| <1.9                        | 1.0(ref)          |                | 1.0(ref)          |                | 1.0(ref)          |                |
| ≥1.9, <3.5                  | 1.37 (1.24, 1.51) | <0.0001        | 1.36 (1.23, 1.50) | <0.0001        | 1.21 (1.08, 1.35) | 0.0008         |
| ≥3.5                        | 1.72 (1.56, 1.89) | <0.0001        | 1.76 (1.60, 1.94) | <0.0001        | 1.17 (1.04, 1.31) | 0.0089         |
| <i>P</i> for trend          | <0.0001           |                | <0.0001           |                | 0.0903            |                |
| 365-day all-cause mortality |                   |                |                   |                |                   |                |
| Lactate (tertile), mmol/L   |                   |                |                   |                |                   |                |
| <1.9                        | 1.0(ref)          |                | 1.0(ref)          |                | 1.0(ref)          |                |
| ≥1.9, <3.5                  | 1.23 (1.14, 1.34) | <0.0001        | 1.22 (1.12, 1.33) | <0.0001        | 1.16 (1.06, 1.27) | 0.0015         |
| ≥3.5                        | 1.42 (1.31, 1.54) | <0.0001        | 1.45 (1.34, 1.58) | <0.0001        | 1.08 (0.97, 1.19) | 0.1474         |

*P* for trend

<0.0001

<0.0001

0.6246

---

HR: hazard ratio; CI: confidence interval.

Models were derived from Cox proportional hazards regression models.

Crude model adjust for: none.

Adjust I model adjust for: age, gender.

Adjust II model adjust for: age, gender, acute kidney injury stage, congestive heart failure, coronary artery disease, liver disease, stroke, respiratory failure, pneumonia, SIRS, potassium, albumin, platelet, bicarbonate, BUN, PT, INR, APTT, WBC, creatinine, bilirubin, SPO2, heart rate, systolic blood pressure, diastolic blood pressure, respiratory rate, temperature, renal replacement therapy, Elixhauser comorbidity index, SOFA, SAPSII.

In Table 3, after adjusting for more relevant confounding factors, we found a positive correlation between lactate levels and 30, 90 day all-cause mortality in critically ill patients with AKI.

**Table 4** Relationship between urine ketone bodies and all-cause mortality in different models

| Variable                             | Crude Model       |                | Model I           |                | Model II          |                |
|--------------------------------------|-------------------|----------------|-------------------|----------------|-------------------|----------------|
|                                      | HR (95% CIs)      | <i>P</i> value | HR (95% CIs)      | <i>P</i> value | HR (95% CIs)      | <i>P</i> value |
| 30-day all-cause mortality           |                   |                |                   |                |                   |                |
| Urine ketone bodies (tertile), mg/dL |                   |                |                   |                |                   |                |
| <15                                  | 1.0(ref)          |                | 1.0(ref)          |                | 1.0(ref)          |                |
| ≥15, <50                             | 1.96 (1.50, 2.55) | <0.0001        | 1.58 (1.21, 2.06) | 0.0008         | 1.25 (0.88, 1.79) | 0.2068         |
| ≥50                                  | 1.98 (1.41, 2.77) | <0.0001        | 1.48 (1.05, 2.09) | 0.0234         | 1.36 (0.88, 2.09) | 0.1670         |
| <i>P</i> for trend                   | <0.0001           |                | 0.0009            |                | 0.1502            |                |
| 90-day all-cause mortality           |                   |                |                   |                |                   |                |
| Urine ketone bodies (tertile), mg/dL |                   |                |                   |                |                   |                |
| <15                                  | 1.0(ref)          |                | 1.0(ref)          |                | 1.0(ref)          |                |
| ≥15, <50                             | 1.88 (1.40, 2.52) | <0.0001        | 1.54 (1.15, 2.07) | 0.0041         | 1.18 (0.80, 1.73) | 0.4032         |
| ≥50                                  | 1.78 (1.22, 2.61) | 0.0031         | 1.38 (0.94, 2.03) | 0.1012         | 1.36 (0.85, 2.18) | 0.2009         |
| <i>P</i> for trend                   | <0.0001           |                | 0.0060            |                | 0.2727            |                |
| 365-day all-cause mortality          |                   |                |                   |                |                   |                |
| Urine ketone bodies (tertile), mg/dL |                   |                |                   |                |                   |                |
| <15                                  | 1.0(ref)          |                | 1.0(ref)          |                | 1.0(ref)          |                |
| ≥15, <50                             | 1.80 (1.43, 2.27) | <0.0001        | 1.44 (1.13, 1.82) | 0.0026         | 1.17 (0.85, 1.60) | 0.3370         |
| ≥50                                  | 1.86 (1.38, 2.51) | <0.0001        | 1.37 (1.01, 1.86) | 0.0413         | 1.20 (0.81, 1.78) | 0.3650         |

*P* for trend

<0.0001

0.0027

0.2962

---

HR: hazard ratio; CI: confidence interval.

Models were derived from Cox proportional hazards regression models.

Crude model adjust for: none.

Adjust I model adjust for: age, gender.

Adjust II model adjust for: age, gender, acute kidney injury stage, congestive heart failure, coronary artery disease, liver disease, stroke, respiratory failure, albumin, bicarbonate, creatinine, systolic blood pressure, diastolic blood pressure, respiratory rate, SOFA, SAPSII.

In Table 4, after adjusting for more relevant confounding factors, we found that urine ketone bodies levels were not independently associated with 30, 90 and 365-day all-cause mortality in critically ill patients with AKI.
